# Supplementary material for: A non-transcriptional function of Yap regulates the DNA replication program in Xenopus laevis
Source: eLife journal article supplement (doi:10.7554/elife.75741), 2022-07-15
Supplement: supp [file Fig1B_Yap_Recruitment.xlsx]

## Sheet: Feuil1
Control 10	+GEM 10	Control 30	+Gem 30	Control 60	+Gem 60	Control 90	+Gem 90
0	1.42852	18.3197	17.7582	51.8298	15.5007	100	15.3758
2.05861	0	57.571	2.56342	66.0974	28.5359	100	52.3144
2.41637	0	1.56815	2.71117	64.4271	100.638	100	8.26503
0	0	19.8681	12.6894	62.5059	26.5548	100	42.565
6.32176		150.892	73.4299	72.6592	35.6909	100	25.596
8.69329		55.8183	57.8421	90.0532	50.4631	100	147.263
2.98308		64.695		70.2767		100	81.9643
4.74385		53.3606		46.9589		100	4.28641
		21.8012		130.879		100
		179.733		292.869		100
