# Supplementary material for: A non-transcriptional function of Yap regulates the DNA replication program in Xenopus laevis
Source: eLife journal article supplement (doi:10.7554/elife.75741), 2022-07-15
Supplement: supp [file Fig1E_F.xlsx]

## Sheet: Feuil1
Source data to Figure 1E and F	Replicate 1	∆mock	∆Yap		Replicate 2	∆mock	∆Yap		Replicate 3	mock	∆Yap		Replicate 4	∆mock	∆Yap		Replicate 5	∆mock	∆Yap		Replicate 6	∆mock	∆Yap		data to Figure 1F	Replicate	mean ∆Mock	mean ∆Yap	Mean ∆Yap/∆Mock
Rhodamine fluorescence intensity/Nucleus (AU)	Figure 1E	757	740			733	162			1826	17080			23912	3533			2785	16767			1426	1000			1	698272	901594	1.29118
CTF	scatter blot	67365	61986			894	184			2425	70271			82994	72085			14403	53380			4763	12889			2	391943	572944	1.4618
means and ratio of means		69440	77784			1243	406			4415	246336			241765	102377			30462	180171			5510	53642			3	4.18436e+06	5.83871e+06	1.39537
		87628	79377			1512	623			4634	251573			252543	163122			42909	200423			8927	118481			4	4.10577e+06	6.25084e+06	1.52245
		95211	79377			1554	685			5098	286144			258558	252599			55417	204587			21618	167640			5	5.50192e+06	7.33624e+06	1.3334
		101161	85753			1950	1326			13011	385568			275770	259901			59131	231318			25464	239672			6	2.90635e+06	5.22869e+06	1.79906
		107709	85753			2265	1327			13538	472130			317319	339370			85279	254535			26601	309788
		114178	85857			2316	1441			14453	475108			323145	382371			93326	274028			38048	323445			mean			1.46721
		115476	93132			3103	1442			22410	526128			339554	458270			93744	290735			47850	371615
		117892	93132			3247	1484			26216	582494			376191	464242			99982	356785			54679	586065
		153607	108335			4448	1509			28333	587950			429381	919013			105819	390604			67901	596550
		185089	108335			5472	1742			30250	624629			480892	1054597			117779	412216			93383	608157
		191829	112877			5918	1836			47641	649525			666715	1077213			123529	751666			94727	676497
		215123	138794			6007	1999			48414	716904			731444	1146343			143320	837743			97171	770898
		217295	147598			6108	2428			57157	749788			780217	1161510			157325	893473			106182	786011
		219243	161858			6183	2549			59840	755841			796006	1183471			172075	914787			120720	804536
		220620	168098			6380	2599			60271	814860			864402	1193124			177061	1025050			125212	946141
		252267	190977			6573	2643			61316	821492			868865	1196757			190191	1046725			126094	990178
		258880	190977			6733	2710			62055	852946			870532	1243255			196843	1268326			127255	1098484
		266617	213126			7043	2767			70742	858172			895676	1283117			225735	1328752			135303	2027714
		275685	233898			7294	2815			76432	1027840			935768	1344878			241959	1528486			152064	2285252
		280717	233898			7887	3245			79269	1124947			1000188	1443814			266316	1652132			171663	2472051
		288437	265747			8095	3368			79273	1205989			1062200	1463631			268180	1850121			180526	2516074
		294624	265747			8236	3426			82094	1330089			1081613	1484137			274775	1865949			217533	2560107
		295045	266836			8256	3465			153084	1372161			1146116	1505232			278006	2017092			220339	2788731
		313120	269910			8823	3534			169540	1462906			1203901	1538671			280975	2035064			247725	2789483
		328126	273925			9044	3673			221125	1479319			1234804	1678185			346642	2147180			256530	2790129
		349841	275089			9120	3813			283369	1586888			1371796	1731930			352481	2164121			277461	2804918
		356494	283631			9205	3840			296973	1700614			1450618	1855869			389763	2180883			278259	2870562
		358741	302366			9621	3868			306035	1918484			1485254	1865184			398675	2201621			318589	3068119
		360221	320296			10435	3998			308774	2088685			1579373	1887177			412490	2379747			465053	3196988
		374775	320296			10872	4065			321737	2106078			1609763	1899636			415158	2423354			483014	3252658
		375197	325895			12201	4386			323252	2132351			1668338	1980328			431774	2435199			521444	3327683
		375664	328776			12392	4636			336995	2155588			1779600	2000906			442535	2477243			523247	3852877
		377123	355184			12618	4860			371901	2230555			1995270	2087273			445061	2480220			542444	3951171
		380633	363908			12788	5006			394069	2285813			2008281	2217562			464495	2522980			615556	3961379
		386005	363908			12795	5121			398326	2303784			2091066	2236319			481407	2667690			632578	4092135
		386162	380752			13096	5490			423405	2575171			2116506	2236377			484302	2676380			820370	4101497
		408372	388115			13321	5917			462892	2580043			2130806	2247404			503464	2748738			822550	4317064
		414311	388115			13466	6633			469112	2610316			2172852	2357634			534777	2762358			873487	4349228
		418595	388859			13584	6968			516239	2615077			2189524	2400164			556261	2862511			904683	4388617
		424066	388859			13873	7483			526629	2768464			2235130	2445421			560149	2908845			940469	4393540
		431400	390233			14017	8027			566416	2769982			2245995	2485638			575908	2916556			986412	4458911
		441154	398947			14738	8091			593131	2905288			2257556	2754766			724817	3104663			989053	4487901
		441502	424989			14910	8181			599099	3003157			2313726	2778875			769537	3237618			994612	4543699
		445985	425893			14987	8335			617417	3111386			2369174	2956443			823007	3249426			1056000	4547458
		449051	425893			15145	8438			618584	3135932			2437827	2977342			832423	3292399			1080963	4682958
		459846	426853			15908	8866			717888	3141550			2538279	3060103			850590	3541064			1087379	4746647
		466377	431903			15961	9018			731113	3216355			2583360	3262192			857074	3710418			1163306	4790825
		468083	431903			16048	9848			786848	3255514			2649051	3267977			899006	3914583			1235477	4857650
		468670	444729			16454	9997			793070	3313221			3022655	3276314			942998	4065708			1360423	4871084
		470506	446540			16719	10338			809215	3332153			3057271	3307591			986725	4228334			1620195	4887823
		483495	457987			17292	10676			841674	3336275			3092790	3334128			1094135	4240873			1652210	5047314
		487708	458580			17979	10898			887759	3350927			3234317	3463096			1165681	4269102			1880591	5053252
		488828	466672			18021	11059			922505	3418024			3316056	3944029			1280437	4392836			1990322	5122835
		489811	470882			18031	11396			930036	3674883			3444031	4127399			1340647	4418511			2058851	5249046
		494035	471687			18314	11569			937863	3915776			3515486	4314129			1381205	4786716			2227806	5298887
		508575	476063			19015	11717			1069011	4025432			3624116	4419608			1395242	4889488			2267122	5403782
		514528	491596			20509	11768			1121314	4323467			3640565	4497151			1396820	4915032			2371885	5510301
		516446	495525			21668	11861			1137302	4323819			3681656	4589782			1442088	5024632			2480112	5529897
		527493	495986			21996	11881			1185519	4344439			3734160	4766251			1452420	5081470			2956051	5578606
		530668	498201			23126	11979			1238346	4351357			3815062	5119108			1483447	5142462			3208062	5892322
		541189	498518			23613	12037			1275344	4355551			3842655	5363316			1505094	5324787			3276426	5907537
		546310	498518			23731	12322			1279071	4387431			4088074	5456002			1551056	5444522			3380465	5953079
		549293	522712			23786	12573			1330129	4438643			4192168	5558244			1623543	5818295			3457897	5956685
		566873	533788			24228	12575			1335678	4719947			4240661	5658075			1640908	5930145			3551632	6029762
		574790	537659			24757	12582			1347210	4800438			4266761	5742272			1648547	6063704			4021128	6040004
		576943	537852			25271	12883			1364233	4807223			4317334	6177646			1735984	6115956			4114641	6153065
		577012	537852			25421	13191			1397297	4966495			4329434	6366706			1797246	6126626			4139565	6154788
		578879	537981			25596	13211			1420887	4967151			4335651	6581760			1851317	6131205			4192807	6439314
		597553	537981			26554	13565			1448855	4996182			4355514	6587430			1923153	6188534			4498453	6478215
		603584	542043			26751	14247			1513329	5007796			4376167	6660219			1975540	6247093			4661890	6544165
		619833	557483			26920	14276			1547391	5050363			4395229	7210597			1997635	6630097			4701178	6560884
		625360	557483			27547	14411			1564367	5229526			4602386	8018233			2086337	6714708			4728006	6587506
		633352	560904			27705	14877			1574203	5298641			4651376	8284730			2171868	6773286			4838960	6653730
		673534	592373			27845	15163			1576146	5330513			4717661	8870416			2209853	6910267			5113659	6730253
		691271	595250			28411	15250			1577483	5386356			4950494	8888253			2220733	6937874			5189925	6998535
		719846	600992			28499	15523			1586789	5389414			4952183	9154306			2230517	6939288			5248857	7135251
		787411	603520			28596	15871			1592639	5446485			4993203	9466466			2481220	7074292			5431994	7659409
		825968	606185			28698	16301			1641468	5452359			5126084	9616272			2504818	7132642			5453237	7902191
		828431	607274			29622	16311			1673715	5665823			5283147	9831538			2528239	7148473			5507167	8151448
		852833	613644			30237	17917			1674591	5716402			5337482	9901203			2595637	7191200			5863180	8431162
		861154	625430			30687	18019			1677131	5776380			5372394	10124978			2687105	7362786			6091759	8609672
		922282	644651			30710	18123			1683900	5892398			5379140	10407692			2689014	7407533			6476622	8681492
		1033783	651124			31082	18812			1736649	5996364			5379925	13338793			2744146	7428720			6806246	8925602
		1049198	651124			31267	18853			1745959	6008482			5609482	14557234			2782058	7538804			6946331	9994720
		1050693	658938			31973	19436			1759727	6133709			5671859	14954519			2865259	7705597			6966858	10140911
		1064713	672170			32259	19911			1768326	6297006			6182241	15621758			2924730	7787777			7456973	10210308
		1088103	675305			32342	20724			1792952	6359920			6544326	17192605			2977977	7823607			7938002	10225643
		1275078	691451			32526	21712			1852873	6506242			6637266	18717555			3045385	8025301			8035791	10335861
		1282092	691451			32606	21993			1918627	6524602			6653537	18849082			3081350	8028192			8119063	10449743
		1341665	702603			32634	22156			2179376	6526070			7081046	19076075			3134765	8105969			8308479	11530678
		1341860	702603			33199	22408			2209534	6526471			7790916	21066636			3149237	8283427			8374509	11988068
		1439624	706912			34047	22445			2232678	6541424			8126998	21509050			3186462	8326205			8675233	15412536
		1769648	716265			34107	22455			2438480	6771031			8763908	23066983			3223942	8391934			8823411	16748093
		1938041	716265			34454	22545			2476007	6789536			8787234	25775558			3268661	8423798			9893373	17137567
		1972361	730578			34534	22882			2662810	6846376			10341074	26801036			3336989	8510347			12238691	26144269
		2144867	740796			34895	23838			2670238	6912941			10658703	30123336			3360530	8838829			25838573
		2507249	768624			35526	25011			2706916	7094260			10881899	39690274			3402599	8952037
		3265462	778731			35758	25339			2715175	7172853			11675876				3910512	8956588
		4694346	791888			35903	25846			2761343	7337938			11853411				3947671	9267254
		5747718	811510			35987	26066			2988733	7364530			13810628				4053411	9294436
			813207			36017	26485			3030687	7389359			13841016				4067322	9618104
			813207			36312	27577			3032543	7446686			15503654				4068556	9652748
			814009			36875	28160			3168811	7508932			18726237				4159959	9728905
			814009			37050	28419			3207030	7591139			26587678				4248050	9751684
			819455			37201	28653			3564014	7602756							4301199	9775134
			823415			37266	29078			3733571	7787906							4543907	9793845
			824861			37332	29368			4106968	7800690							4668371	9816587
			842814			37685	29400			4114639	7814454							4779712	9939793
			856389			38381	29468			4454201	7881621							4856092	9965790
			856389			38409	29528			4477162	7931926							4880461	9999075
			858656			39573	29561			4503446	7934015							4908227	10182822
			891737			40185	30042			4565785	7941481							4992356	10298005
			900116			41172	30126			4582223	7998095							5037320	10308802
			901995			41482	30390			4621324	8067198							5078818	10402817
			964343			42556	30674			4703126	8079527							5287828	10407069
			974532			42759	30743			4813998	8118325							5365605	10415043
			994919			43057	30814			4870837	8242582							5402325	10566860
			1040766			43188	31906			4981309	8379568							5554337	10679366
			1041454			43990	31956			5069539	8452141							5580412	10754050
			1041454			44824	32013			5104113	8679961							5984358	10844377
			1110707			45542	32149			5315194	8735931							6288268	11048032
			1110707			45679	32383			5497154	8795668							6305186	11163804
			1176891			46242	32611			5757179	8816307							6350509	11298338
			1199176			46280	33157			6102871	9082439							6389467	11819059
			1304057			47697	33535			6416365	9371752							6697807	12136430
			1347040			47960	34591			6506502	9455145							6745247	12318191
			1381177			48235	35011			6827914	9594231							6983413	12696311
			1437671			48485	35270			7555631	9676958							7382601	12771853
			1445446			49100	35502			8263055	9776302							7582349	12875358
			1505490			49303	36027			8522177	9899911							7599217	12879209
			1506619			49512	36343			8570842	9959661							7652030	13077048
			1507802			50534	37090			8586199	10026882							7790885	13394342
			1533042			51049	37589			8643285	10041854							7837536	13412557
			1547506			51223	37803			8743465	10105673							7875598	13427005
			1580503			52531	37865			9035229	10127036							7973168	13464426
			1636827			53345	39040			9095808	10153211							8093733	13536569
			1637385			53458	39238			9401497	10158230							8418682	13615311
			1666082			53536	39784			9603980	10166466							8819440	13712018
			1685237			53688	40516			9625362	10254376							8951766	13742447
			1808119			54189	40569			9680459	10441497							8973888	13790699
			1966746			54813	40610			9761819	10693822							9195013	14110173
			1986403			54982	41142			9845152	10799741							9277191	14267786
			2016586			55441	41543			9894135	10846267							9315719	14469059
			2038653			55993	42112			10035222	11326526							9454312	14604717
			2055467			56091	42142			10289712	11513596							9509777	14760567
			2282159			56173	42842			10442244	11545439							9554773	14774639
			2491116			56302	42870			10532952	11663484							9989836	14790306
			2517330			56544	43110			10575030	11857253							10017162	14947981
			2603862			57127	43233			10627141	11890200							10018222	15403530
			3047818			57191	43588			10689088	12104628							10096927	15528671
			3178882			57414	44018			10735341	12192801							10314366	15993205
			3430809			58013	44068			10758652	13559625							10366402	16732797
			3858321			58418	44754			10819229	13795393							10759093	17238931
			5571393			59803	45149			10953435	14845437							11165690	17247154
			5882510			59883	45328			10983056	16243813							11286552	18136759
			6901210			60284	45651			10985343	16616778							11432114	18240686
						60632	45900			11028566	17126432							11573877	18491962
						61964	46030			11079836								11660895
						62446	46550			11196822								11816022
						62627	46924			11398146								11845201
						62632	46963			11439649								11871147
						63342	47437			11466478								11927213
						63660	47627			11978825								12161044
						64505	47826			12249921								12199361
						64560	48492			12494252								12528758
						66174	48523			12602018								12535355
						66462	48564			12653686								12666228
						67537	48756			12669753								12667209
						67976	48916			12998095								12783569
						68298	48923			13378090								13048824
						68827	50520			13428738								13112368
						70141	50566			18852718								13326306
						70214	50639			22926596								13543514
						70854	51751											13865443
						71208	52536											14168402
						71910	52930											14288810
						72461	53003											14402025
						72585	53725											14690457
						73081	54780											14723297
						73732	55163											14867271
						74379	55298											14973074
						74485	56023											15018617
						74701	56042											15483165
						74857	56720											16224514
						75054	56940											16445675
						76884	57096											16666997
						77615	57148											18626937
						77688	57340											18639002
						77782	58602											30356911
						79739	58676											34670656
		698272	901594			79868	59037			4.18436e+06	5.83871e+06			4.10577e+06	6.25084e+06			5.50192e+06	7.33624e+06			2.90635e+06	5.22869e+06
			1.29118			80839	59392				1.39537				1.52245				1.3334				1.79906
						81924	60023
						82112	60527
						83416	61123
						83576	61124
						84473	62643
						84521	62662
						85983	63021
						86132	63293
						86373	63561
						86523	64117
						87737	64986
						90326	65064
						90474	65123
						90796	65273
						91403	65415
						91621	65603
						92235	65871
						92290	66343
						92995	66441
						93041	66564
						93467	66592
						94093	67021
						94137	67167
						94609	67822
						96299	67841
						96493	68475
						96598	69022
						97278	69137
						97562	69320
						98205	69477
						99297	69523
						99675	69739
						99982	70397
						100040	71180
						100174	71846
						100414	72433
						100924	72559
						101824	72924
						102083	73158
						102364	73294
						103049	73779
						106516	75764
						106631	76066
						107231	76392
						108566	76852
						109672	77244
						110101	77306
						111784	78109
						112416	78426
						112798	78560
						112814	78762
						113299	79632
						113369	79788
						113930	80542
						114770	81677
						114940	84700
						115276	86319
						116792	86342
						117463	89361
						117883	89972
						119343	92794
						120940	92812
						121571	93669
						121938	93877
						122294	94135
						124215	94551
						124428	95320
						124766	95587
						125206	95992
						125529	101542
						125624	102763
						126555	103121
						127006	105851
						130631	109318
						131561	109749
						133725	110922
						133780	111461
						134087	112230
						134890	113210
						134952	113400
						136847	114807
						136978	116119
						137197	118863
						138665	119057
						140921	119374
						144021	120082
						144533	122167
						144740	123554
						148525	124153
						148933	124551
						149751	125635
						150052	127260
						151613	129308
						152868	130708
						156219	132231
						156540	133949
						159053	134569
						159352	137568
						163017	138853
						163285	138953
						163741	141096
						164376	141613
						164904	142663
						165175	145929
						165427	146271
						166943	147068
						169586	147699
						172461	148657
						172561	149408
						172697	153056
						174739	154474
						175419	160879
						176237	160981
						176827	163000
						177238	164746
						177318	166939
						177522	171667
						179211	171821
						181631	171854
						182423	172361
						183127	173111
						183968	173117
						184489	173224
						184715	174304
						184932	175613
						185655	176227
						186447	178336
						187713	178865
						187996	181395
						188751	181415
						192189	182475
						192315	182656
						193212	182812
						194768	182814
						198333	182884
						199145	183032
						199253	183980
						199607	186036
						199647	186285
						200438	187055
						200548	195694
						200676	198072
						203119	200561
						205265	202067
						205277	202298
						206031	202612
						206690	203299
						206734	203714
						208495	204000
						208574	204075
						209798	205808
						210252	206623
						210916	207451
						211731	213796
						214401	215637
						217486	217113
						218600	219234
						218739	219454
						220114	225069
						226286	226139
						228798	227344
						230875	230312
						231225	232424
						231361	233762
						231424	233922
						235936	234351
						236709	235830
						243687	236636
						250982	239359
						251151	240811
						252003	241052
						252408	242393
						253032	242959
						254809	249298
						255686	253825
						255698	254118
						256170	255272
						256759	260325
						258575	260773
						261077	265084
						261474	265870
						265490	270391
						265984	270978
						266293	271158
						266399	272832
						266596	276079
						266600	278151
						268089	279625
						268837	282385
						270934	286735
						275856	287115
						277827	292242
						284719	293751
						286296	296436
						287821	296803
						291872	310486
						296790	314066
						302050	319984
						307332	320110
						317345	321503
						318945	334601
						319859	335374
						322166	340244
						329427	341567
						330089	344970
						331752	346995
						338535	347141
						343164	350999
						345988	355687
						352649	357706
						353055	358530
						353287	362554
						364760	363607
						367583	364480
						372855	365909
						374765	369658
						378458	376038
						380064	378018
						381004	380535
						390829	383708
						393561	404664
						393885	406397
						394246	428055
						402496	446984
						402746	457758
						410916	460177
						420768	462024
						421747	465118
						422209	478255
						422683	480219
						424679	480854
						428302	483566
						429185	488841
						429628	489937
						439921	491818
						447018	492112
						453270	508669
						457592	514754
						457819	522638
						457886	528979
						458531	534074
						464448	541590
						478616	542557
						496866	552180
						501344	556749
						501689	558819
						504419	561643
						504836	567309
						504846	573134
						505574	573895
						524890	591723
						535525	606377
						543159	615950
						550049	628021
						550147	634589
						550572	645619
						551362	656063
						551433	682265
						553059	692355
						569197	705424
						583553	711270
						583793	719293
						621872	735721
						623623	748331
						626728	764872
						649947	782095
						654411	787785
						657870	801970
						659470	804793
						665667	806247
						687079	806651
						697498	830312
						701240	852294
						710573	859918
						719129	863935
						724844	866224
						728704	867277
						740873	873928
						789686	892219
						792104	896880
						798831	904424
						800854	912708
						831675	913406
						856666	926413
						880650	930674
						881950	931894
						898740	990781
						898816	992883
						924926	1064735
						960663	1130645
						968921	1176586
						970350	1186806
						1039920	1199306
						1066118	1223946
						1075336	1229837
						1092476	1231625
						1171436	1240791
						1174287	1302773
						1236891	1331884
						1253735	1373627
						1271556	1396517
						1277650	1403460
						1282039	1406627
						1335557	1467256
						1355544	1483519
						1412261	1546246
						1418981	1561309
						1459807	1593119
						1475251	1609308
						1502849	1650173
						1540459	1651683
						1557539	1660379
						1564972	1693873
						1572806	1699228
						1579698	1721626
						1625329	1807541
						1654686	1937024
						1663282	1990029
						1678384	1999681
						1721391	2003344
						1743692	2006894
						1791072	2089021
						1847982	2178091
						1897639	2206291
						1944713	2223701
						2205083	2227287
						2320999	2307318
						2365079	2318367
						2397382	2333361
						2430182	2342158
						2621135	2387891
						2813781	2441173
						2951658	2552266
						2991026	2601970
						3201640	2612952
						3263566	2635386
						3337101	2660470
						3610462	2685986
						3786539	2764366
						3885154	2792018
						4138632	2852490
						4294046	2879232
						5670366	2916888
						6439586	3081877
						7374912	3156359
							3168578
							3377721
							3710569
							3820738
							3859876
							3985846
							4004986
							4404974
							4763622
							4968004
							5230269
							5325633
							5382680
							5738024
							5781571
							5821001
							5991292
							6002697
							6478384
							6536244
							6662659
							6852207
							11065583
						391943	572944
							1.4618
