# Supplementary material for: A non-transcriptional function of Yap regulates the DNA replication program in Xenopus laevis
Source: eLife journal article supplement (doi:10.7554/elife.75741), 2022-07-15
Supplement: supp [file Fig1G.xlsx]

## Sheet: Feuil1
Source data Figure 1 G		Replicate 1	DNA synthesis (ng/µl)
		min	DMock	DYap
		40	0.0604493	0.145239
		50	0.1875	0.521309
		60	0.336751	0.707739
		70	0.696505	1.3232
		80	0.965317	1.50562
		Replicate 2	DNA synthesis (ng/µl)
		min	DMock	DYap
		60	0.002	0.352535
		70	0.20301	0.736854
		80	0.611419	1.45418
		90	0.856664	1.87922
		110	1.05927	2.36761
		130	1.73445	3.40403
		180	2.72698	4.63198
		Replicate 3	DNA synthesis (ng/µl)
		min	DMock	DYap
		70	0.211604	0.413507
		80	0.665492	0.991696
		90	0.884315	1.15999
		110	1.52093	2.60512
		130	2.52639	3.51335
		180	2.89974	3.475
