# Supplementary material for: A non-transcriptional function of Yap regulates the DNA replication program in Xenopus laevis
Source: eLife journal article supplement (doi:10.7554/elife.75741), 2022-07-15
Supplement: supp [file Fig1H_Yap_mock_ratiosAlkGels.xlsx]

## Sheet: Feuil1
	ratio Yap/Mock	ratio Yap/Mock	ratio Yap/Mock	ratio Yap/Mock
Replication group	0-25 %	25-50%	51-75%	76-100%
	1.25966	1.07467	1.17649	1.14815
	1.3683	0.875508	1.04488	1.05534
	4.98517	1.70327	1.33082	1.19255
	1.62701	1.18473	2.1106	1.12237
	1.18711	2.08839	2.52371	1.20872
	1.82507	1.4441	0.767376	1.67761
	1.10874	3.13074		1.62947
	1.32839	2.16322		1.29146
	2.51593	0.718115		1.22119
	1.26544	2.41866		1.44122
		1.3646		1.05222
				1.02529
				1.03098
