# Supplementary material for: A non-transcriptional function of Yap regulates the DNA replication program in Xenopus laevis
Source: eLife journal article supplement (doi:10.7554/elife.75741), 2022-07-15
Supplement: supp [file Fig1Sup3B_RawIntensity.xlsx]

## Sheet: Feuil1
Time (min):	15	20	25	30
DMock	530.577	2854.85	3814.39	4126.1
DYAP	714.042	3303.32	6222.22	8114.58
