# Supplementary material for: A non-transcriptional function of Yap regulates the DNA replication program in Xenopus laevis
Source: eLife journal article supplement (doi:10.7554/elife.75741), 2022-07-15
Supplement: supp [file Fig5C__RescueCellNumber.xlsx]

## Sheet: Feuil1
Control	Gain of function	Yap-depleted	Rescue
19	14	22	16
19	10	23	16
14	11	22	17
18	12	20	16
17	15	23	17
16	12	23	15
14	11	22	19
15	13	20	19
17	11	19	18
16	9	20	19
19	15	21	19
17	16	21	17
18
14
17
16
