# Supplementary material for: A non-transcriptional function of Yap regulates the DNA replication program in Xenopus laevis
Source: eLife journal article supplement (doi:10.7554/elife.75741), 2022-07-15
Supplement: supp [file Fig5D_TrimCellnumber.xlsx]

## Sheet: Feuil1
Control	Yap1-depleted	Rif1-depleted
14	23	21
14	22	22
14	25	21
12	22	24
13	25	24
15	20	22
12	25	20
17	22	22
15	23	21
15	23	23
14	22	22
13	22	23
10	21	22
13	25	23
14	22	25
13	24	21
12	21	22
15	20	23
15	22	21
16	23	20
13	22	25
12	22	21
13	25	24
20	21	20
19	23	21
	22	21
