# Supplementary material for: A non-transcriptional function of Yap regulates the DNA replication program in Xenopus laevis
Source: eLife journal article supplement (doi:10.7554/elife.75741), 2022-07-15
Supplement: supp [file Fig5Sup1A_Quantification.xlsx]

## Sheet: Feuil1
		Yap gel1	Tub gel1
2Cell	Ctl 2C	4.6504e+07	4.57947e+07	1.01549
	Mo 2C	3.765e+07	4.87317e+07	0.772599
	Trim 2C	6.84991e+07	2.92915e+07	2.33853
	Mo+Trim 2C	3.59962e+07	3.8655e+07	0.931216
4Cell	Crl 4C	1.68087e+08	4.85777e+07	3.46016
	Mo 4C	7.78376e+07	5.71648e+07	1.36164
	Trim 4C	6.76008e+07	35888861	1.88362
	Mo+Trim 4C	7.06029e+07	5.00606e+07	1.41035
8Cell	Ctl 8C	8.85564e+07	2.78827e+07	3.17604
	Mo 8C	6.59566e+07	5.8983e+07	1.11823
	Trim 8C	2.41213e+07	3.39306e+07	0.710902
	Mo+Trim 8C	14438047	2.98428e+07	0.483803
NF7	Ctl NF7	1.34268e+08	4.74223e+07	2.83134
	Mo NF7	1.05699e+08	5.04706e+07	2.09428
	Trim NF7	6.00143e+07	3.20048e+07	1.87517
	Mo+Trim NF7	2.34376e+07	4.07833e+07	0.574685
NF9	Ctl NF9	1.50127e+08	5.12131e+07	2.93142
	Mo NF9	1.17786e+08	5.74515e+07	2.05018
	Trim NF9	3.34529e+07	3.69714e+07	0.904831
	Mo+Trim NF9	1.45577e+07	50695507	0.28716
