# Supplementary material for: A non-transcriptional function of Yap regulates the DNA replication program in Xenopus laevis
Source: eLife journal article supplement (doi:10.7554/elife.75741), 2022-07-15
Supplement: supp [file Fig6_Sup2_eyesize.xlsx]

## Sheet: Feuil1
Control-MO/ GFPmRNA	Control-MO/ rif1mRNA	rif1-MO/ GFPmRNA	rif1-MO/ rif1mRNA
117612	90314.4	95890.1	106132
112811	110817	73103.4	97458.2
123691	88494.6	67198.6	122607
108939	105648	73277.6	94070.2
114108	125104	81679.8	104544
107235	117806	73587.4	108977
121891	122123	99258.7	105686
98484.3	107487	84700	106364
102860	104196	84564.5	107738
84274.1	107951	79898.7	103905
81215.2	108939	76491.4	112927
113566	117670	82744.6	98135.8
121077	98252	79647	109810
96180.5	100459	97458.2	106538
112017	104680	67566.4	106557
113101		99781.4	109539
		75020
