# Supplementary material for: A non-transcriptional function of Yap regulates the DNA replication program in Xenopus laevis
Source: eLife journal article supplement (doi:10.7554/elife.75741), 2022-07-15
Supplement: supp [file Fig6F_eyesize.xlsx]

## Sheet: Feuil1
Control	Rif1-MO
132210	96053.6
121103	126839
130877	115705
128032	97307.1
130282	90390.2
138487	123406
140461	100013
118419	102720
154731	112808
126513	115476
