# Supplementary material for: A non-transcriptional function of Yap regulates the DNA replication program in Xenopus laevis
Source: eLife journal article supplement (doi:10.7554/elife.75741), 2022-07-15
Supplement: supp [file Fig7E_EdU+cells.xlsx]

## Sheet: Feuil1
Control	yap-MO	rif1-MO
7.16	4.5	7.66
9	5.4	7.25
7.8	6.6	7
7.25	7	8.25
8.28	6	8.2
9.2	8.33	9
7.16	7	7.33
9	7.16	8.25
9	5.83	6.83
7.75	5.2	3.8
7.33	6.16	7.5
6.5	7.2	6
7.8	6.4	6.83
6.66	7.25	7.33
8	8.5	8.5
6.75	6.75	7.2
		5.8
