# Supplementary material for: A non-transcriptional function of Yap regulates the DNA replication program in Xenopus laevis
Source: eLife journal article supplement (doi:10.7554/elife.75741), 2022-07-15
Supplement: supp [file Fig7F_FociRatio.xlsx]

## Sheet: Feuil1
Control	yap-MO	rif1-MO
1.04	0.28	0.48
0.62	0.92	0.45
0.44	0.73	0.16
0.7	0.29	0.43
1.32	0.42	0.41
1.7	0.21	0.35
1.38	0.34	0.29
1.25	0.65	0.43
1	0.25	0.41
0.34	0.23	0.35
1	0.48	1.25
2.25	0.38	1.3
0.34	0.1	0.61
0.73	0.45	0.91
0.9	0.3	0.7
2	0.5	0.56
		0.61
