# Supplementary material for: A non-transcriptional function of Yap regulates the DNA replication program in Xenopus laevis
Source: eLife journal article supplement (doi:10.7554/elife.75741), 2022-07-15
Supplement: supp [file Figure2F_G.xlsx]

## Sheet: Feuil1
Source Data	Figure 2F	eye-to-eye distances (kb)			Figure 2G	eye lengths (kb)
Combing	replicate 2	∆mock	∆Yap		replicate 2	∆mock	∆Yap
	80 min	20.8	12.3		65 min	1.9	10.9
		17.8	29.9			6.1	2.2
		18.6	46.2			2.6	3.2
		25.9	40.2			2.6	1.9
		2.9	11.2			12.2	1.6
		6.2	8.3			2.6	1.6
		15	14.9			3.5	1.9
		14.9	3			1.6	2.2
		3.7	13.3			1.6	1.3
		10.7	19.7			5.8	9.9
		13.1	41.8			1.6	16.6
		5.4	44.8			2.9	28.8
		5.1	30.9			2.2	51.2
		7	27.5			1.9	2.2
		25.9	20.2			2.2	8.6
		13.8	12.2			1.6	3.5
		85.6	13.1			1.9	7.4
		7	11.8			18.9	1.6
		47.7	7.7			2.2	16.6
		36.8	15.7			2.2	1.6
		16.3	14.7			2.6	39.7
		5.1	10.6			14.4	52.8
		41	16.2			2.2	1.9
		57.6	15.4			2.6	1.6
		18.2	9.8			2.2	47.7
		4.5	14.1			2.2	1.3
		4	14.4			1.3	1.9
		6.2	8.6			1.3	24.3
		20.3	13.8			1.9	1.6
		7.2	8.6			1.6	2.2
		4.5	8.5			2.2	1.6
		22.6	15.2			2.2	1.9
		5.8	7.4			1.9	1.9
		31.4	6.2			1.3	1.6
		13	15.4			8	1.6
		15.7	25.4			1.3	5.1
		9.6	5.1			1.6	3.2
		5.9	12.2			1.9	2.2
		8.5	29			2.6	1.9
		26.6	24.5			1.9	1.9
		55.8	9.8			1.6	4.2
		9.8	18.6			1.9	2.2
		15.7	40.5			21.8	3.2
		3.8	10.7			1.3	1.6
		4.2	7.7			27.5	1.6
		6.1	19.2			8.3	1.3
		10.1	8.8			1.6	2.2
		7.8	16.5			1.6	1.9
		9	13.3			2.2	3.2
		11.8	11.5			2.2	4.5
		5.6	10.1			2.2	1.3
		28.3	8.6			2.2	6.4
		6.4	17			1.9	9.9
		10.9	3.7			1.3	7
		7.7	9.3			1.6	11.8
		5.3	11.8			2.2	1.6
		13.4	9.9			1.3	1.3
		6.1	15.2			1.6	1.3
		61.8	6.6			3.2	1.6
		37.6	5.4			1.3	1.3
		11.4	5.4			5.4	1.6
		17.9	41.1			4.2	9.6
		57.4	95.2			2.9	8
		51.7	10.7			12.8	1.6
		32.2	15.8			1.3	2.6
		25.6	14.2			1.6	1.3
		10.7	6.9			1.3	2.9
		2.7	6.1			3.5	1.9
		7.4	6.1			2.9	3.2
		38.1	8.2			7.7	4.8
		12.6	3.8			8.3	4.8
		78.2	32.8			1.6	4.8
		16.6	5.9			4.5	8
		48.8	7.8			1.3	3.2
		55.7	6.6			5.8	2.2
		26.1	60.8			1.9	10.6
		30.1	13			1.9	21.1
		24.5	9.6			6.4	7.4
		17.4	5.1			25	1.3
		22.6	5.1			2.6	1.6
		27.2	40.6			2.9	1.6
		21.3	18.6			1.3	9.9
		12.5	17.8			6.4	1.9
		22.7	17.8			4.8	2.9
		42.6	17.3			16.3	4.8
		33	20.8			8.3	1.9
		51.7	15			3.2	1.3
		48.3	12			1.3	1.9
		47.7	13.1			1.9	1.3
		12.2	10.7			2.6	7.4
		30.2	29.1			1.3	1.9
		14.6	28.2			1.3	1.3
		56.3	30.9			1.3	3.5
		22.2	33			1.3	15.7
		85	6.4			1.6	2.9
		57.9	4.3			4.2	24.3
		40.2	8			1.6	2.6
		10.9	18.4			1.9	6.1
		19	7.7			4.5	2.2
		45.8	17.8			1.9	1.6
		21.9	14.4			20.5	11.5
		5.8	5.3			1.3	2.9
		3.4	9.6			2.2	1.9
		35.7	6.7			11.2	2.9
		21.8	39.4			2.2	2.6
		64.3	3.5			1.3	18.9
		9.8	9.9			3.2	19.2
		9.3	16			1.6	2.2
		8.6	6.1			1.3	3.8
		10.4	3.5			1.9	1.9
		4.6	48.2			2.9	2.9
		51.8	5.1			1.6	1.6
		20.8	5.8			2.9	2.9
		22.7	7.5			1.9	1.3
		35.7	94.2			6.4	1.3
		45.9	11			1.6	4.5
		13.4	5.9			1.3	17.6
		8.2	8.6			7.4	6.7
		13.6	5.1			2.2	4.8
		21.6	9.8			3.2	3.5
		4.5	6.4			5.4	2.2
		15.2	18.9			5.1	1.6
		14.1	19.2			2.2	9
		21.8	13			2.6	5.8
		9.4	12.5			2.2	5.1
		8.3	29.6			2.9	5.8
		18.1	67.4			1.9	2.9
		30.4	22.6			12.5	2.9
		24	20			10.2	14.7
		8.6	12.6			1.9	12.8
		22.1	9			1.9	1.6
		11	34.2			8.3	2.2
		11.8	21.1			12.5	1.9
		14.6	5.6			1.3	1.3
		9.3	10.1			10.2	3.2
		9.9	7.2			1.3	2.6
		10.2	29.3			6.7	2.2
		40.5	9.4			5.1	2.6
		16.5	13.3			2.9	1.3
		27	3.8			2.2	1.3
		17.8	9.9			1.9	1.6
		6.1	28.2			1.6	2.2
		25.3	11.2			3.8	1.9
		13	6.2			5.4	1.6
		99	8.2			1.9	1.9
		49	10.9			2.2	11.2
		66.9	11.5			1.9	1.9
		60.8	11.4			6.1	2.6
		31.4	10.2			1.6	1.9
		63.5	5			1.9	36.2
		19.4	6.7			1.9	4.2
		29.6	12.6			8.3	2.9
		45.4	16.3			1.6	1.9
		38.2	16.5			2.9	1.3
		33.1	20.6			7.7	1.9
		20.6	5.6			1.3	4.5
		8	5			1.6	2.2
			4.3			1.9	1.9
			38.1			5.4	1.3
			8.8			1.6	1.3
			8.8			2.6	1.6
			7.8			1.3	1.3
			19.7			2.9	2.9
			6.1			1.6	32.6
			33.1			2.2	1.6
			31			1.9	1.3
			9.4			1.9	1.3
			8.6			1.6	1.6
			3.8			1.9	1.6
			11.7			1.9	1.3
			14.1			2.2	1.6
			10.6			1.6	18.9
			37.4			3.5	34.2
			14.4			4.2	1.6
			10.7			2.6	1.6
			6.4			2.9	1.3
			13.8			1.6	43.5
			9.8			1.9	2.9
			5.9			1.9	2.2
			8.8			1.9	2.6
			19.2			1.9	1.6
			9.3			1.6	32
			4.8				6.1
			5.1				1.3
			40.8				2.2
			11				2.2
			7.7				1.9
			15.4				16.6
			89.9				15
			10.2				2.2
			7.7				1.6
			4.5				1.9
			37.9				16.3
			20.2				2.6
			11.7				4.5
			3.7				2.6
			5				1.9
			15.4				2.9
			13.8				1.9
			5.4				6.1
			20.2				2.6
			9				1.6
			4.2				1.6
			5.1				1.6
			8.8				1.3
			9.9				19.8
			10.2				12.8
			10.6				21.4
			9.1				13.4
			11.7				2.9
			6.9				1.3
			9.3				14.7
			8.6				13.4
			10.4				1.6
			12.2				5.8
			14.7				13.4
			7.2				2.2
			16.3				3.5
			13				1.9
			3.5				2.6
			4				1.6
			8.8				1.9
			66.2				4.2
			50.6				2.2
			22.1				1.9
			5.4				1.6
			10.4				1.6
			8.5				1.9
			5.6				2.2
			15.8				1.3
			31.2				1.6
			10.2				2.2
			5.9				3.5
			5.8				2.2
			8.2				6.7
			9.4				18.2
			15.4				5.1
			10.4				3.8
			13.6				2.2
			20.8				2.9
			12.6				7.4
			16.6				3.5
			16.6				1.9
			35.4				1.9
			16.2				1.3
			10.6				19.5
			7.2				1.3
			6.1				2.6
			9.1				1.3
			14.9				11.2
			41.8				1.9
			5.6				1.6
			3				1.6
			48.2				2.9
			83.8				2.2
			12.5				4.8
			18.6				2.2
			15.4				1.6
			6.4				1.3
			8				1.6
			5.9				3.2
			5				1.3
			7				1.3
			9.8				1.3
			10.4				1.9
			13				2.2
			6.1				2.6
			8.3				1.3
			18.1				1.3
			17				3.5
			9.3				33.9
			10.2				57.9
			7.7				25.3
			10.9				6.1
			14.4				15.7
			15.5				26.9
			29.1				1.6
			24				1.6
			8.5				19.2
			52				1.6
			8.2				3.2
			12.6				2.2
			35.7				3.2
			21.8				1.3
			6.9				2.6
			28.2				1.9
							3.8
							9.9
							28.5
							19.5
							2.9
							48
							1.6
							3.2
							5.4
							1.9
							8.6
							1.3
							25.9
							1.6
							1.6
							4.8
							1.6
							1.9
							39.4
							8
							18.9
							39
							22.4
							1.3
							2.2
