# Supplementary material for: A non-transcriptional function of Yap regulates the DNA replication program in Xenopus laevis
Source: eLife journal article supplement (doi:10.7554/elife.75741), 2022-07-15
Supplement: supp [file Figure2Hquantification.xlsx]

## Sheet: Feuil1
source data		OD band (AU) 45 min	Cdc45	PCNA	Orc2	Cdc45/Orc2	PCNA/Orc2
Figure 2H		∆Mock	3.49267e+07	1.00876e+07	8.33045e+07	0.419266	0.121093
quantification bands		∆Yap	7.66526e+07	2.63597e+07	9.54379e+07	0.803167	0.276197
Western blot 45 min
