# Supplementary material for: A non-transcriptional function of Yap regulates the DNA replication program in Xenopus laevis
Source: eLife journal article supplement (doi:10.7554/elife.75741), 2022-07-15
Supplement: supp [file Grey-Values-Rif2.xlsx]

## Sheet: Feuil1
Control	Rif-MO
13.8	10.3
12.2	10.7
12.2	9.3
12.7	10
10.3	11.1
10.7	9.6
11.9	10.5
12.7	8.9
13.2	8.7
11.7
13.4
