# Supplementary material for: A non-transcriptional function of Yap regulates the DNA replication program in Xenopus laevis
Source: eLife journal article supplement (doi:10.7554/elife.75741), 2022-07-15
Supplement: supp [file Grey-Values-Yap.xlsx]

## Sheet: Feuil1
Control	Yap-MO
14.7	15.7
16.3	12.1
16.6	17.1
14	15
16.5	15.1
16.1	13.1
19	11.4
17.6	13.2
17.2	11.5
