# Supplementary material for: A non-transcriptional function of Yap regulates the DNA replication program in Xenopus laevis
Source: eLife journal article supplement (doi:10.7554/elife.75741), 2022-07-15
Supplement: supp [file SourcedataFig1Figsuppl2.xlsx]

## Sheet: Feuil1
Figure 1-Figure Supplement 2 -lanes alkaline gel quantification
min	Mock	Yap
45	1249127	1311559
60	2067361	3636918
75	4244568	10432000
90	8041425	25418560
120	30334770	49077890
