# Supplementary material for: A non-transcriptional function of Yap regulates the DNA replication program in Xenopus laevis
Source: eLife journal article supplement (doi:10.7554/elife.75741), 2022-07-15
Supplement: supp [file SourcesdataFigure 4C_D.xlsx]

## Sheet: Feuil1
Source data to Figure 4 C and D		Replicate 1	∆Mock	∆Rif1		Replicate 2	∆Mock	∆Rif1		Replicate3	∆Mock	∆Rif1		Replicate 4	∆Mock	∆Rif1		Replicate 5	∆Mock	∆Rif1		Replicate 6	∆Mock	∆Rif1		data to Figure 4D	Replicate	mean ∆Mock	mean ∆Rif1	Mean ∆Rif1/∆Mock
Rhodamine fluorescence intensity/Nucleus (AU)			4347	507			183	3490			11	26			349	486		Figure 4C	2157	824			1853	184			1	635376	1.92502e+06	3.02973
CTF			8452	950			1547	5213			20	39			938	1648		data for scatter blot	2181	2249			2110	2606			2	271082	1.1947e+06	4.40718
means and ratio of means			11792	3627			2556	8631			26	42			1030	2692			3642	2608			3658	3114			3	15875.2	33017.8	2.07984
			12084	15080			2845	11135			42	103			1201	2863			8747	5293			3908	3880			4	431487	971044	2.25046
			14966	44484			2907	13011			48	204			2379	3234			9048	5828			4410	4158			5	593799	2.00347e+06	3.37399
			17012	53103			3168	14270			99	377			2614	4063			20991	7279			4499	4699			6	194509	747838	3.84474
			23428	54804			4093	14410			138	423			3432	5239			21004	7423			5651	4901
			26973	69834			5218	15369			146	461			3479	6612			21874	8404			6131	8341			mean			3.16432
			29715	79194			5296	18881			182	492			3550	6894			24288	8436			6490	9965
			30753	84377			5845	20662			190	515			3656	8991			26502	8739			7297	10215
			37890	86156			6268	21148			211	524			3675	9941			26727	13303			7941	10990
			39246	89120			6952	22487			218	526			3928	12284			27347	14022			8271	11702
			41449	90135			7063	23207			226	578			4041	13310			27657	14752			10968	12741
			42308	90664			7090	26621			259	589			4290	14432			28924	14997			11131	12985
			43932	92655			7237	29026			310	610			5211	15006			29662	17786			11660	13055
			44433	92967			7735	31553			312	662			6003	18854			31454	17890			12499	15517
			50007	107668			8365	31704			349	738			6044	19446			32785	21198			12513	16226
			53704	115192			8456	32092			385	801			7434	19560			35668	29138			12918	16525
			53792	126769			8520	34105			469	974			7456	20381			35739	31444			13340	18861
			54282	127865			8874	34290			520	992			7457	21218			40163	33029			13354	19476
			59559	134058			10157	35023			542	996			7691	22779			40940	34299			13495	19879
			60732	139199			10288	36369			548	1001			8662	27417			42470	35134			14366	23002
			65676	141221			10442	36591			573	1012			10398	27678			43381	35255			14522	24318
			70366	152717			10619	38746			587	1074			11360	28015			44813	42872			15089	24665
			73517	155949			10685	39193			619	1099			12138	29774			45603	43694			15188	25923
			75472	162934			10863	40888			637	1104			12205	30132			46149	46126			15532	26336
			77799	166028			11054	41093			689	1146			13405	32671			47473	46418			15831	27658
			80761	174103			11077	41140			733	1202			13407	33222			48849	47160			15948	30401
			89607	175111			11433	46060			747	1222			13418	33316			49274	48454			16190	30667
			89917	176622			11475	47016			751	1225			13502	34016			49457	49299			16354	34386
			92203	186166			11639	47908			761	1227			14644	37220			50213	52925			16654	37331
			93454	195164			11667	49206			790	1262			15407	38411			53752	53057			16873	37661
			95984	210863			11822	49289			794	1308			15622	38519			56071	54961			17214	39616
			96464	216222			11897	51040			817	1309			15634	40643			58375	55333			17508	39909
			98140	220800			12046	53209			821	1350			16564	42233			59498	55916			17860	40811
			99353	224567			12059	53750			840	1461			16605	42657			59980	63214			18353	42428
			105030	225319			12171	53932			903	1472			16763	42911			60033	66487			18853	43974
			107133	226238			12209	53969			918	1477			17085	44315			62057	70409			19029	46292
			107893	242891			12442	54234			925	1598			17148	44560			63341	73284			19158	47928
			116851	251981			12747	54391			937	1627			17203	44771			64257	81975			19295	50561
			121727	254248			12753	54513			960	1645			17509	44803			66648	85189			19582	54055
			121981	263200			13211	56268			1009	1699			17632	45882			66886	90550			20397	55052
			124908	272318			13631	56686			1039	1727			18019	46254			67958	95079			20436	57972
			126066	275975			13672	60207			1062	1877			18066	47505			68671	98473			20629	58842
			126537	281945			13688	60782			1127	1955			18276	48403			69848	99154			20808	60398
			127635	298076			13794	64413			1135	1963			20029	48823			71387	99358			21010	60431
			127993	301738			14084	66109			1155	2005			20200	49922			72241	115912			21531	61109
			129540	318566			14416	66892			1162	2048			20418	50036			72988	116682			21572	61697
			130302	328607			14823	67038			1183	2074			21423	50251			79542	118516			22055	63410
			130787	329809			14831	67829			1198	2209			21707	52011			80198	122651			22277	64941
			133304	333356			15313	68497			1207	2269			21725	53088			82009	123363			22357	65018
			135799	334426			15429	68545			1249	2280			22075	55081			83412	134826			22366	66525
			136027	337157			15657	70219			1285	2286			22168	57587			84813	135104			22436	66585
			136939	345658			15946	70823			1306	2302			22242	59419			85088	139467			22442	68640
			138655	365402			16041	70945			1310	2315			22563	61509			85911	141128			23210	69365
			139407	410513			16207	72646			1381	2316			23881	63453			87144	143921			23231	71376
			150414	417065			16210	73036			1403	2332			24065	63749			87394	144843			23373	72845
			154405	417989			16729	73391			1441	2337			24354	63830			88193	145621			23395	75088
			158856	450287			16787	74367			1445	2347			24389	65113			90053	150666			23611	79493
			159625	549492			16895	79210			1463	2446			24687	65414			91076	151037			24573	80699
			161683	567394			17056	79862			1486	2455			24723	65721			93616	151380			24655	82164
			162645	602843			17415	81715			1523	2505			24841	66833			93915	166465			24780	82863
			164108	617160			17675	82146			1524	2539			24848	67733			93934	167166			25341	84298
			164378	617331			18883	82219			1571	2569			25149	67746			94342	169648			25478	87397
			165430	621461			18950	84463			1587	2575			25262	68442			95057	172865			25488	90741
			169551	643874			19071	86433			1595	2578			25356	70986			96367	174705			26336	90952
			172791	654200			19399	87162			1596	2617			25812	71805			96870	178364			26561	92190
			173994	662378			19404	87403			1624	2650			26666	74711			97219	201723			26691	92542
			180461	665629			19611	88047			1646	2691			26919	75289			97270	207370			27108	93226
			180651	666807			19671	88931			1659	2743			27958	76997			97629	214735			27504	94581
			188516	673447			19730	89266			1668	2748			28017	77992			98142	226132			27737	94734
			192372	673669			20298	90381			1697	2780			28052	78646			98158	226513			28019	96859
			192807	679603			21518	90505			1707	2827			28055	80907			99124	230098			29166	98210
			194225	690105			22474	91442			1708	2848			28520	81299			99452	232182			29439	99167
			195180	692613			22896	91933			1711	2853			29247	83165			100204	232515			29944	100018
			205438	700118			22939	95705			1728	2996			29266	86774			100235	235910			30031	100099
			208004	721638			23404	96856			1741	3004			29314	89426			101315	243609			30999	100767
			209205	737875			23638	98451			1742	3083			29524	90566			102965	243639			31204	101447
			213068	747608			23847	100607			1745	3091			30059	91383			103225	246843			31673	104394
			219955	755858			24221	104009			1747	3146			30164	91701			103394	250412			31768	106041
			220544	761461			24471	104917			1756	3163			30427	94465			104390	261454			32358	108444
			222282	767325			24586	105025			1765	3264			30841	95188			105866	266509			32457	111618
			228905	769399			24720	105578			1773	3289			32411	95677			110297	267529			32587	112519
			233062	771481			25211	106045			1781	3297			32965	96025			111262	267543			32648	112984
			236572	786169			25284	108479			1788	3315			33770	96201			112349	269324			32880	116125
			254115	795930			25504	109385			1797	3319			34741	97671			112705	269728			33506	116760
			254571	805731			26056	109760			1802	3369			34935	97727			114334	270007			34134	119736
			257903	807834			26477	110459			1804	3423			35262	102324			115251	275755			34663	120057
			263238	848885			26482	111407			1809	3445			36274	103711			115567	276710			35277	120856
			263981	866328			26488	112732			1814	3452			37375	105299			118356	277891			35702	121440
			264793	874832			26696	114147			1820	3466			37387	105367			120400	278145			35875	122690
			284142	877603			27411	114351			1889	3538			37477	107605			120529	283186			36192	124593
			292651	883080			27942	114491			1899	3572			37512	107697			120798	287119			37845	125953
			295482	893090			28285	117603			1901	3573			37841	108432			121419	290642			38343	125973
			299045	910686			28528	124507			1902	3599			38261	108912			121523	290703			38390	126130
			299164	929932			28577	125563			1903	3754			38583	113763			122518	292973			38431	127393
			325098	941133			28607	126245			1905	3840			38715	114955			123269	293653			38699	128412
			328992	942745			28785	126781			1907	3867			38924	117041			126086	299054			39249	128987
			335042	943320			28886	128390			1920	3909			39992	120300			126188	303353			39357	129668
			350503	948761			29025	128470			1927	3928			40506	120452			126995	308865			39932	130026
			352864	983308			29153	129562			1935	3939			40643	120855			129300	314186			40559	130868
			353764	988249			29615	130432			1939	3958			40749	120877			130312	315662			40886	132911
			359886	998853			29663	130755			1944	3963			41704	121053			131131	320753			41283	132941
			368026	1039034			30614	130800			1947	3978			42023	127823			131450	320848			41315	135834
			375289	1039937			30661	130992			1948	3994			42104	131695			133104	325032			41445	137470
			377965	1045384			30752	131160			1950	4017			42251	133326			135066	325294			41521	138209
			382565	1061076			30970	132888			1951	4028			42892	136979			135764	328272			41811	138937
			383865	1078378			31331	134546			1951	4033			43621	142524			136573	331195			42755	140171
			391175	1083196			31452	135304			1954	4108			43699	143389			138470	332361			43030	140259
			404966	1084086			31713	135360			1954	4151			43743	146270			141130	334934			43545	140391
			409727	1101018			31783	136481			1957	4175			45097	146693			141715	339408			43766	140630
			411681	1164027			31787	136996			1972	4194			45216	146722			141730	357790			44929	144233
			414944	1170395			31827	143464			1980	4201			46453	155943			142810	361412			45595	145078
			423163	1201330			31878	144110			1982	4220			46628	155974			144747	361570			45625	145333
			426023	1205197			32028	147130			1984	4225			47308	158476			146369	365927			45778	146713
			438672	1205663			32219	150340			2003	4361			48581	158740			149552	371179			45896	151806
			439001	1230309			32539	150769			2023	4390			49052	159011			150755	377202			46189	152505
			446552	1260984			32708	158048			2058	4396			49735	159265			157007	379005			46218	156173
			449267	1261440			32719	158392			2073	4452			50835	159613			157426	379906			46591	156174
			457964	1266859			33442	164777			2079	4625			51761	162935			157978	384886			46994	157880
			460754	1293683			33650	165821			2092	4630			52107	166742			158916	395536			47003	158592
			496227	1294552			33960	167598			2106	4686			52464	168799			159202	399066			47241	158830
			497308	1310788			34142	167959			2111	4687			53344	170627			159477	404617			48009	162902
			505837	1349612			34147	168714			2111	4724			53662	171462			160714	406675			48161	166487
			535925	1351156			34179	169505			2112	4728			53666	171787			162571	413930			48244	167437
			545915	1368855			34458	170523			2116	4729			53920	171945			164834	414078			48621	169289
			560374	1370789			34797	170919			2121	4782			54137	173746			168278	416305			48701	169798
			562469	1380734			34848	171047			2140	4802			54368	174277			169722	417825			48753	171854
			567578	1390830			34860	172747			2152	4954			55360	174475			170433	421799			49745	172427
			567780	1407800			34992	176053			2152	5116			57373	176158			177032	428028			49937	173824
			598558	1412681			35320	176722			2156	5182			57586	187218			181828	432470			49949	174549
			622450	1437319			36281	177230			2170	5210			58454	187346			182236	434213			49972	176331
			623019	1441256			36468	179043			2170	5226			58572	189844			183018	438457			50068	177088
			623458	1453877			37172	182607			2178	5257			59242	193345			185165	439925			50160	177095
			630910	1455653			37267	182930			2184	5313			59991	196044			187163	445330			50651	180350
			668871	1465495			37508	183711			2201	5374			60019	198906			188420	453569			50683	182271
			676332	1506937			37583	186651			2203	5387			60497	200721			188971	463340			50796	185228
			690742	1524373			37734	187566			2228	5395			61078	201951			189458	463751			51721	188389
			722757	1529352			38025	187802			2248	5453			61646	202770			189835	472715			51962	188438
			740462	1543804			38289	189471			2263	5503			63540	205566			191512	473796			52079	188460
			764243	1544596			38388	189905			2264	5516			63889	206664			191779	478701			52135	190102
			774006	1562040			39069	190038			2270	5533			64653	207700			192578	483096			52512	190353
			823535	1620637			39071	190841			2272	5565			66067	207701			193804	485539			52620	191354
			829464	1654368			39215	192382			2296	5611			66180	208976			194196	487469			52888	193817
			859593	1654526			39437	194043			2328	5726			66522	210838			195413	488102			53218	194323
			928817	1755979			39956	197447			2342	5733			66526	215379			195901	491921			54337	195418
			937853	1826707			39984	200099			2346	5740			68336	224699			201072	492114			54846	199593
			979285	1870164			40274	200874			2346	5842			68693	229413			201138	492868			54884	200438
			1019214	1886722			41030	201006			2349	5872			68954	230113			203357	496552			55069	200443
			1030124	1895082			41114	202825			2363	5927			69155	234565			203609	500215			55197	201384
			1043117	1900549			41141	203697			2371	5932			70714	236396			203944	503133			55499	201569
			1067963	1922415			41192	206762			2372	5968			72900	236890			206428	504159			55949	201878
			1089165	1935019			41209	206907			2387	5974			73891	238340			206486	504502			56266	202799
			1090453	1938205			41717	207175			2414	6012			74310	239406			208728	505490			56397	204125
			1106641	1949728			42017	209380			2414	6049			74615	240053			209783	508383			56743	204938
			1131614	2127605			42393	210608			2423	6113			74625	248962			212281	508926			56790	206486
			1176192	2237028			42659	212858			2423	6170			74704	249230			212589	510473			57036	208273
			1190727	2277861			42749	214759			2437	6259			76035	253596			213920	511374			57255	209606
			1197357	2402578			43148	218054			2463	6318			78017	256662			216101	512938			57321	209892
			1327070	2569313			43154	218865			2501	6357			78638	263514			216869	515330			57613	212623
			1335031	2577330			43781	221287			2502	6499			79864	263527			218002	515637			58387	213285
			1366785	2734208			43924	221716			2504	6501			80669	264938			219070	521354			58507	214446
			1389584	2790785			44367	224425			2512	6593			81550	266559			221136	528101			58574	220056
			1500581	3048705			44411	227890			2519	6603			81604	270338			223922	529424			58821	220314
			1539495	3497702			44434	228960			2531	6616			82647	271915			224094	534483			59232	220815
			1540238	3538491			45297	231672			2533	6623			83935	274488			224287	541316			59314	221321
			1540507	3545169			45572	233064			2535	6648			83976	275426			224585	544232			59316	221639
			1631168	3641856			45644	234053			2550	6651			85722	278822			225542	550920			59407	223009
			1658258	3660720			45767	235408			2555	6658			85757	284733			225912	555576			59566	225240
			1674440	3746134			46132	235517			2560	6685			86254	285239			226992	558603			59606	225669
			1678107	3793005			46299	240807			2564	6704			86367	289958			227182	563726			59622	225733
			1693358	3843516			46467	244241			2565	6721			88010	290096			228056	569301			60285	225789
			1740553	3902572			46477	248414			2567	6726			90461	293938			231329	571007			60462	226332
			2124227	3925455			46533	254434			2582	6745			91355	302453			231603	573173			61079	226673
			2272457	4002405			47155	254490			2594	6788			91522	307286			231839	578096			61297	226947
			2347338	4231180			47297	256096			2605	6844			91750	307878			232615	580310			61440	227033
			2796999	4232222			47300	257462			2608	6921			93399	310050			232616	580537			61637	228385
			2819619	4366798			47483	257898			2619	6950			93468	311504			233736	582105			61652	233221
			3185204	4523757			47551	258375			2643	7114			95501	311759			234669	583429			61669	236312
			3873008	4678566			47970	258985			2646	7190			96936	317390			234961	585339			61865	236581
			20632633	4718203			48245	259578			2649	7218			97783	319353			235237	586463			61905	236876
				4780951			48308	260882			2657	7289			98044	322724			236406	590692			62029	237507
				4846500			48321	260998			2688	7323			98948	328251			239782	591440			62194	238046
				5083536			48482	263148			2689	7447			99886	330085			243083	593834			62712	238104
				5135855			48522	264536			2689	7483			99981	335469			243673	596417			63121	238860
				5333319			49155	264928			2705	7498			100379	337932			244602	597562			63930	240220
				5664565			49270	265429			2716	7582			100419	342141			245208	597929			64655	240408
				5817389			49301	266119			2725	7643			101293	345572			247785	605693			65340	241116
				5915962			49306	268774			2725	7653			102023	346005			248280	612259			65365	241226
				6142468			49610	269533			2731	7698			103070	353029			248585	613444			65388	241755
				6165234			49735	270846			2738	7844			103496	356961			248961	614722			65421	242514
				6321307			49749	271086			2767	7876			103545	360058			252857	615838			66139	243735
				6773648			49778	271261			2776	7906			105602	361708			254944	616658			66622	244088
				7106915			49783	271684			2783	7956			107671	371896			257686	616778			66746	244325
				7455500			49910	278314			2790	8015			107765	374081			258303	617853			66912	244608
				7466494			50140	279588			2808	8039			108613	374408			258415	620961			68073	246101
				7700266			50218	280097			2814	8108			110084	377393			263299	622604			68298	246441
				7738693			50625	280270			2817	8149			111798	381957			263366	631786			68510	246666
				7780822			50978	280284			2817	8231			112674	383647			263531	636315			68839	246807
				8199448			52246	280402			2820	8231			112709	385944			264810	640985			68878	246808
				8299707			52308	280908			2841	8252			113297	389267			265548	644443			69351	247412
				8768338			52598	284059			2851	8263			113368	392818			265861	651499			69788	248424
				8807283			53087	285352			2862	8378			114186	393672			266034	654683			70216	248960
				8850651			53208	285536			2864	8410			115711	399010			267567	661651			70396	249758
				9368996			53280	291239			2866	8417			115780	399190			269121	663760			70985	250237
				9903929			53356	292339			2867	8424			116584	412808			270661	665060			71354	253036
				12156089			53907	292695			2870	8482			116754	413008			270694	665981			71731	256122
							54559	298542			2871	8499			116808	413241			274835	666184			71897	256803
							54574	299233			2885	8557			119801	424447			275481	667975			72376	257578
							55233	299608			2886	8580			122238	434854			276054	668128			72659	258420
							55438	299813			2892	8587			123289	437661			278673	673929			72929	259057
							55547	300954			2897	8619			125104	440679			278922	675552			73269	259967
							55770	304743			2906	8871			125165	443373			281657	676242			73378	260318
							56512	305068			2906	8917			125357	449818			282867	676503			73983	261435
							57016	308994			2907	8946			126785	452745			283677	680935			74054	261564
							57073	313584			2920	8954			127857	456439			285571	681489			74136	262152
							57125	315705			2924	9002			127883	461043			287190	681787			74541	264797
							57342	319055			2942	9041			133614	464298			289723	681895			74562	264967
							57876	320458			2949	9055			134100	464462			293010	683727			74604	265606
							58308	322525			2962	9121			135561	464849			299641	687821			74760	265710
							58433	323607			2987	9195			135675	468020			299860	689157			75304	265767
							58506	325085			2995	9219			138512	470600			300625	689689			75582	269002
							58944	336211			3004	9344			140310	474247			301244	691937			75583	269691
							59204	337240			3012	9380			140456	484644			302681	697216			76279	269861
							59284	337466			3029	9391			141842	487547			303058	699278			76436	269979
							59976	338438			3032	9603			142063	490537			303552	701571			76874	270428
							60077	339033			3086	9626			145487	498718			303680	702858			77854	272867
							60548	344416			3101	9648			146259	504166			304892	705737			78036	273414
							60906	347600			3122	9676			149425	505473			305519	707390			78560	275139
							61796	349439			3133	9684			149697	516204			305722	708277			79249	275359
							61887	349693			3138	9715			151146	516805			307476	716093			79368	275827
							62375	351283			3154	9779			152562	523998			307887	718295			79417	275876
							63303	360511			3157	9798			152671	528435			310570	723254			79606	277928
							65150	363706			3160	9845			164404	535592			314524	723500			80129	279478
							65588	370301			3191	9873			169256	539670			319605	728089			80826	279853
							66098	373655			3206	10163			169669	540655			327110	729575			80969	281116
							66512	376269			3224	10315			170399	542078			327928	731366			80997	281356
							67013	379900			3234	10319			171433	544464			328238	737804			81087	283949
							68138	383869			3243	10336			171843	548412			328529	740137			81293	284723
							69349	385571			3258	10693			172163	550411			329057	752954			81518	285435
							69370	385820			3261	10782			172454	550546			329672	753402			81884	286510
							69393	391013			3262	11065			174014	552296			330206	755281			82077	286778
							69460	394707			3282	11074			174510	557639			330399	759506			82399	288739
							69517	402009			3287	11076			176096	558572			331023	762721			82684	290667
							69519	405572			3301	11218			176741	562306			331723	770457			83207	292097
							70001	405595			3302	11274			176794	572995			331769	775928			83270	294099
							71195	406762			3304	11292			178896	575049			332041	777521			83271	295082
							72027	409858			3304	11305			179859	581646			333954	782146			83315	295755
							72968	410501			3311	11502			181465	598679			335621	785680			83386	297101
							74089	415006			3314	11513			183503	602956			337032	789635			83932	297187
							74245	423800			3323	11821			183606	607921			337922	789865			84310	298053
							74417	429161			3324	11859			183770	621535			338300	790288			84473	299816
							74589	429732			3357	11897			185515	627619			339341	796329			84539	300053
							74649	432568			3358	12085			186663	629745			340090	798251			84568	301066
							75250	436766			3381	12108			188081	643505			341297	798458			84877	301362
							75369	440003			3387	12111			189081	648982			342101	800471			85630	301517
							75487	441378			3418	12316			189229	654537			343436	801539			86025	301860
							75491	444612			3421	12325			189522	654745			346030	802898			86216	302350
							75557	447223			3426	12555			191303	658420			348730	803301			86677	307724
							75561	450263			3427	12653			194555	661040			349399	804633			86694	309640
							75586	450378			3453	12802			196167	671986			349681	804792			87478	310606
							75630	452879			3458	12999			196327	672492			350038	811399			87771	311393
							77232	465938			3463	13090			197835	673499			350061	811480			87778	311963
							77475	471002			3475	13156			198045	678922			350631	812197			88228	312195
							77589	478756			3476	13199			198428	680256			350754	817376			88231	314038
							77591	479221			3478	13250			202938	680650			352220	820252			88559	315463
							78275	479993			3492	13321			203050	688068			354162	828975			88937	316235
							78713	485774			3500	13329			203701	689550			354375	847328			88981	316413
							78866	496182			3502	13330			204554	696997			356107	849028			89091	316757
							79226	501574			3506	13343			204876	697595			360530	849342			89409	317265
							79552	508840			3512	13639			210358	703301			361291	853880			89917	318496
							79624	510865			3537	13654			214098	705594			364173	853958			90141	318778
							80269	515627			3543	13722			214146	710293			367355	856309			90364	319121
							80533	517133			3557	13730			214926	722812			372890	859993			90626	320029
							80911	518450			3577	13787			215560	723096			373119	861888			90795	322098
							82169	522956			3582	13824			222285	723644			377821	862494			91355	322286
							83642	525018			3595	13984			222467	730420			382698	871303			91366	322687
							84054	528523			3613	14114			223607	748267			387017	873244			91766	324065
							84416	531445			3622	14244			227705	749048			387255	873999			92719	324919
							85267	536148			3625	14363			229047	756760			396479	883072			93372	325459
							85595	537329			3637	14610			229941	765024			399217	888481			93524	329449
							86482	543874			3663	14701			231937	766271			406483	888858			93907	330173
							87156	547074			3677	14745			234185	768900			410576	891225			94050	333456
							87462	548825			3677	14770			234354	776044			412532	903662			94427	334469
							88151	550110			3688	14797			237237	787046			416664	904691			95273	342673
							88215	550816			3689	14876			238812	789272			416869	907420			95915	342729
							88323	553301			3748	15039			241281	795292			420875	913061			95980	343219
							88358	553892			3782	15102			246973	805794			421668	917275			95992	343755
							89675	558822			3789	15192			249128	819609			428096	922692			97180	344189
							89933	558903			3806	15345			252267	820282			430716	926072			97456	345416
							90619	560572			3808	15569			253155	820410			433998	942278			97671	345872
							91815	565526			3818	15590			254083	824192			435322	952735			98161	346028
							92458	566270			3824	15766			254158	825307			435795	955132			98241	347269
							94308	569095			3843	15924			255716	829221			436188	964771			98770	349070
							94623	573213			3845	15951			257721	838773			436471	971052			98845	349221
							94830	573476			3861	16007			259794	841632			436776	977510			98865	351241
							95445	586183			3867	16179			260421	847743			443444	983644			98921	352256
							97314	593916			3876	16311			265340	854009			452076	990220			99247	352964
							97600	594886			3892	16362			266038	857973			452651	997665			99597	354107
							98198	596821			3915	16418			269121	859730			453236	1004254			100237	356155
							98271	597433			3962	16485			271053	863320			453311	1016239			100991	357925
							98466	600769			3966	16597			274362	866858			454449	1030638			101700	358178
							99975	603027			3967	16626			276065	896010			458236	1038615			102141	358230
							100208	608329			3978	16767			276501	896083			459766	1041830			102195	358498
							101223	613610			4011	16892			278382	911598			461663	1052271			102731	359052
							101237	619184			4062	17035			281464	947853			463214	1056995			102835	362039
							103139	619252			4124	17041			281558	950481			466090	1058931			103191	362177
							107507	640918			4130	17235			282935	967565			466129	1060921			103543	364901
							107665	645008			4142	17289			283297	967937			470290	1061511			106111	367486
							109213	645430			4168	17390			285738	973151			472737	1062220			106199	367756
							111558	652464			4181	17447			287484	978383			477307	1063600			106951	370935
							112628	654541			4183	17507			289185	995808			477351	1070860			107355	372859
							113741	656801			4189	17561			295520	995892			477696	1081070			107655	373588
							115620	662511			4252	17669			299749	1000133			480021	1081329			107689	373657
							119461	670967			4264	17760			300109	1029164			480803	1082045			108191	375442
							121212	674675			4270	17976			301206	1032389			493922	1093065			111023	375480
							121241	675540			4273	18083			302422	1032814			495313	1094507			111287	375685
							122579	679566			4274	18305			302890	1040146			495507	1094795			111396	376157
							123959	683604			4277	18329			303061	1044493			496133	1098125			112812	376823
							124019	685446			4317	18497			305898	1056334			496524	1106113			112849	377504
							125146	685814			4338	18560			309613	1059374			497423	1107777			112865	378833
							126270	691135			4360	18607			314443	1073695			500717	1115578			114516	383963
							126885	691462			4372	18757			319338	1091667			511777	1139327			114547	384372
							127838	696892			4380	18846			322176	1100560			515937	1143748			114969	384519
							129938	703629			4418	18994			323313	1101201			518049	1145180			115321	385446
							134188	706278			4427	19104			324279	1104962			520789	1146601			115450	387962
							135679	707568			4427	19206			324645	1108440			521146	1146914			116545	390950
							135904	708387			4434	19571			324904	1109092			523934	1151168			116741	393454
							140077	714962			4435	19713			333356	1134814			526134	1155439			117094	393961
							140982	721248			4457	19746			337151	1144977			529998	1156224			117496	394283
							141060	731663			4459	19826			342203	1156652			539311	1165169			117813	395042
							141080	731988			4465	19895			342299	1167074			540335	1168889			118170	395102
							141685	735559			4472	19929			342716	1173384			542064	1171772			118175	395551
							141949	735837			4534	20142			345328	1180368			560763	1172727			118524	395948
							142084	737510			4572	20416			350254	1197514			563854	1178516			118881	399573
							142771	755708			4584	20470			352202	1199048			564318	1180719			118980	400838
							145527	762624			4602	20518			353968	1199526			564395	1181532			119676	400995
							146275	767937			4629	20567			354289	1203173			569799	1182952			119695	402867
							148339	768013			4646	20693			354736	1205960			570137	1183396			120434	403327
							149307	769819			4651	20914			356458	1212520			573822	1184137			120540	404990
							150378	772138			4661	21037			358226	1212989			574669	1187174			120721	407275
							150592	780666			4716	21120			359223	1213981			576706	1196627			120908	409037
							151903	787073			4716	21203			360009	1217544			576864	1198791			121677	411148
							152045	787941			4718	21284			362292	1223285			578966	1203265			121909	413042
							152798	795835			4725	21301			362559	1238066			579403	1204495			122056	414141
							153143	798158			4756	21344			369767	1246430			579773	1209550			122238	414426
							154788	799543			4792	21424			370939	1254124			595541	1231453			122510	414997
							155183	806488			4847	21557			371245	1261013			596285	1235511			122574	415500
							155845	807892			4851	22038			374833	1283753			600614	1236980			122713	418609
							156397	816913			4874	22069			391195	1296412			604018	1237682			122767	419589
							157120	820068			4886	22144			394517	1303795			604872	1241874			123444	420068
							158145	820301			4889	22844			399251	1325385			612909	1262726			123615	421044
							159709	827419			4904	23042			400274	1345281			615702	1262753			123620	422076
							159881	828542			4942	23251			404843	1381301			618922	1268198			123734	424727
							160820	834288			4952	23330			410358	1387511			620600	1302416			124670	424923
							161293	837714			4970	23367			411716	1389330			622928	1310453			126436	425616
							162778	840178			4971	23545			416515	1390189			639260	1310708			127147	426924
							163829	845174			5010	23594			419878	1399740			651436	1311124			127418	428072
							163990	848322			5021	23757			423361	1412742			663932	1314586			127895	428182
							165566	848350			5043	23947			424649	1417797			669980	1317456			128091	430361
							166166	850258			5052	24029			425999	1428235			677244	1318122			128745	430959
							166210	851114			5082	24426			427376	1462475			677692	1328920			129716	431205
							166953	854808			5111	24477			435656	1466048			696329	1331349			130866	432177
							167369	858937			5116	24545			436677	1477769			698871	1345094			131452	433408
							167394	859005			5119	24573			443485	1509634			702968	1346836			131593	436279
							171009	862658			5198	24575			452919	1513876			708026	1347190			132497	440104
							171263	868113			5210	24711			456766	1523712			711576	1348514			132634	440105
							171332	868321			5263	24902			469505	1544659			713735	1349025			132766	443634
							171822	876858			5264	24917			469631	1571268			717493	1353139			132783	445712
							174773	876897			5272	25079			474651	1575641			718932	1362627			133230	446680
							175396	881913			5350	25151			481192	1602604			736676	1365608			133874	453197
							176712	882112			5356	25387			482279	1618975			738665	1366906			134263	453686
							177441	884105			5408	25568			482416	1622167			749015	1369979			134351	453886
							178605	904532			5417	26084			487134	1626963			758879	1379364			134359	457817
							178762	907465			5426	26240			489040	1636288			761720	1390429			134479	458669
							180090	927449			5428	26243			495099	1654450			764917	1402051			134511	458686
							180349	928846			5446	26495			495421	1662627			777052	1403252			134526	464147
							181348	933510			5547	26656			506748	1683555			779272	1417751			135388	466150
							183354	937369			5574	26790			511067	1717223			781597	1424867			135640	466702
							186079	940554			5576	26802			512414	1725777			781806	1426257			136600	466821
							187925	945416			5583	26843			513804	1749733			790943	1427992			136713	469667
							188764	950184			5624	27042			517323	1755636			794888	1429525			136929	470889
							188790	961382			5633	27253			517429	1766502			799768	1434711			137085	473479
							192035	964376			5648	27270			518379	1770208			802089	1435020			137832	474388
							192272	968885			5699	27458			519734	1816583			821417	1438581			138488	475593
							192299	970134			5706	27565			521709	1822362			823285	1439020			138593	476383
							193594	972521			5781	27737			523948	1832340			828256	1439483			138619	477001
							193777	979746			5802	28062			550758	1865639			862076	1456364			138905	477477
							197377	991682			5889	28079			554483	1924889			872878	1471822			139248	481996
							197729	992562			5891	28091			557118	1937494			880795	1472338			139381	483595
							198278	996218			5900	28203			569466	1953555			888396	1472449			140098	485876
							198492	1001943			5909	28376			570600	1954494			892461	1473820			140257	488103
							200480	1002183			5924	28867			578142	1958880			899074	1482338			140776	488108
							201317	1007269			5972	28887			580124	2062572			907520	1483279			141124	491273
							202430	1010957			6039	29133			580656	2118336			909635	1484838			141303	493047
							205015	1015087			6058	29380			584946	2163520			933125	1508744			142793	495498
							205626	1015227			6071	29398			587010	2180550			933315	1513887			143001	498425
							205815	1018599			6109	29420			594417	2207527			934501	1523396			143101	502360
							207681	1021809			6114	29740			610268	2218141			935964	1529789			143126	503743
							208973	1027231			6285	29929			611016	2222357			940522	1529869			143677	504099
							210174	1034359			6293	30048			619328	2326289			945837	1532112			143709	506417
							210199	1055917			6312	30175			621098	2386672			974307	1532431			144588	509074
							215629	1069633			6330	30802			623861	2398220			982584	1533184			145139	510490
							217436	1074240			6401	31016			625966	2427170			998247	1537728			145145	510559
							219026	1074358			6427	31039			645138	2435853			1005075	1540700			146467	512245
							224285	1081997			6616	31215			646667	2472820			1022938	1542561			146791	515866
							224685	1084917			6622	31592			653674	2507808			1055460	1561635			147060	516774
							225230	1088906			6714	32023			665945	2565863			1056862	1569333			147291	517385
							226456	1094358			6721	32126			669518	2591971			1065261	1570248			148311	517880
							227980	1103588			6749	32302			670800	2614376			1095691	1574854			149692	518026
							228108	1114542			6770	32305			690194	2629887			1129181	1585091			150331	519043
							228213	1124400			6774	32377			700106	2647693			1131423	1589398			150459	519674
							236320	1127785			6849	32634			716511	2655450			1144695	1599715			150970	520393
							236556	1128646			6915	32728			718161	2712217			1165365	1601149			151045	520456
							238539	1132161			6980	32843			733782	2713004			1175640	1602402			151861	521010
							238967	1138338			7005	32974			737943	2727371			1176721	1617709			151955	523424
							238990	1145011			7081	33023			751505	2740490			1186084	1617812			152049	523975
							240137	1153789			7143	33450			754225	2804373			1191486	1627715			153602	528932
							243314	1158111			7176	33473			760408	2949599			1208528	1634604			153913	531302
							245335	1160117			7178	33641			763841	2955479			1221166	1637862			154017	531597
							247036	1163978			7229	33672			773127	3029157			1223611	1656858			154212	531867
							254870	1166048			7299	33700			776350	3083185			1227217	1664904			154504	534496
							261387	1167711			7333	34095			781490	3105902			1236263	1667182			154600	534925
							263609	1168618			7338	34455			805194	3140117			1239459	1679915			154810	541203
							265559	1169135			7359	34729			805741	3177708			1239623	1680163			154991	542985
							265635	1173700			7384	34768			818156	3215756			1241847	1682998			155214	543137
							265931	1174139			7407	34902			819206	3257063			1248554	1686150			157610	543432
							266596	1186204			7483	35212			821751	3312834			1253260	1687258			158900	544570
							268618	1200167			7558	36004			823754	3586503			1274410	1692633			159137	547400
							269749	1219341			7601	36247			824186	3704366			1286717	1694946			159816	547522
							271189	1225703			7683	36655			837173	3798729			1289624	1704206			160108	548640
							276075	1229351			7701	37180			837439	4003873			1341078	1705977			161389	550337
							280492	1231840			7701	37322			863264	4145338			1367395	1707375			161519	551234
							281019	1236002			7862	37345			868214	4309846			1368739	1707976			161688	553471
							281261	1238413			7909	37348			870898	4387783			1389469	1713413			161765	555775
							281533	1239549			7931	38025			871685	4450923			1422940	1718602			161965	556498
							283331	1255083			8152	38093			876913	4761153			1445784	1730584			162200	558436
							284296	1264754			8312	40163			885258	4897300			1451953	1731066			162995	560061
							285429	1266924			8355	40227			890107	5195115			1490485	1734016			163587	560814
							286334	1271981			8454	40890			892468	5242845			1514592	1737880			163726	560862
							286889	1275348			8457	41545			895168	5392789			1522732	1756592			164342	562815
							289638	1281137			8498	41681			912526	5627676			1544241	1759638			165184	564351
							307943	1284931			8517	42000			915137	5900460			1557104	1769885			165784	565836
							308087	1296178			8737	42167			930342	6098221			1582028	1772011			166211	567519
							314855	1298787			8741	42534			946317	6767822			1595675	1775552			166281	570607
							315730	1301380			8752	43400			955153	7401796			1608568	1776340			167718	571887
							319650	1310415			8883	44000			967550	9781664			1711234	1782692			167910	574240
							328449	1320716			9276	45256			984826	13534389			1713555	1785839			168045	575302
							328455	1321562			9304	45834			1002494	14795431			1716325	1792086			168782	577391
							328558	1323283			9372	45929			1008620				1719443	1808034			168817	579104
							332285	1328004			9483	46519			1008920				1733704	1816316			169697	580764
							333172	1328377			9809	46586			1010622				1759422	1820494			170136	580967
							333473	1337859			9848	47508			1012195				1769169	1833222			170255	581244
							335391	1339130			9948	47738			1034644				1783461	1833757			170929	582739
							339616	1342387			9998	48227			1050613				1803512	1860480			170936	583987
							343998	1351566			10163	49453			1061832				1816289	1865334			171228	589266
							345149	1370209			10237	49728			1073579				1821144	1869460			172260	596009
							345859	1374375			10303	50056			1083526				1825181	1872820			174132	597097
							351002	1379480			10340	50397			1091275				1825851	1874619			175773	598102
							360533	1385161			10440	50452			1093234				1853033	1879152			176992	599409
							360724	1389656			10837	50641			1117664				1858951	1884385			177240	604302
							362866	1390988			10972	51770			1124480				1924807	1923593			177256	606187
							365093	1394057			11041	51791			1130023				1964610	1927880			177307	608776
							376081	1395244			11102	54712			1150236				2024843	1928124			178231	615723
							379127	1398202			11194	55139			1156694				2105227	1931396			179095	616775
							379512	1402160			11304	56837			1157496				2133955	1934916			179730	619230
							382735	1405350			11422	57252			1176886				2176954	1943081			180208	622276
							387617	1420449			11482	57983			1180055				2177039	1962786			180230	623805
							399952	1439867			11507	58442			1227078				2193281	1971771			180355	624442
							417088	1451792			11608	60058			1237690				2266396	1974792			181010	626819
							420195	1461706			11915	60190			1293330				2451925	2009364			181943	629188
							422772	1468213			12063	61415			1320699				2586472	2011169			182674	640404
							428695	1487530			12454	62255			1340717				2588339	2023088			183155	641860
							430175	1493087			12469	62825			1342670				2607436	2061527			184110	643188
							433895	1510402			12927	65609			1344208				2718204	2064951			184466	644814
							436871	1557699			13210	66112			1363195				2765260	2080375			187309	645349
							438155	1565168			13616	66784			1392177				2856434	2084610			187666	646861
							438708	1579079			14007	68129			1430165				2953590	2085370			187938	649984
							447350	1590258			14718	69086			1452729				3493821	2085467			188194	653828
							453074	1613673			18067	69093			1457558				3800159	2086336			188965	655077
							456770	1628333			18348	69588			1469618				4204152	2092896			189230	656368
							460062	1630312			18440	69747			1500289				4714851	2109699			189733	657219
							461731	1635395			19230	69956			1502251				9715591	2117276			189751	658697
							467538	1653023			19966	69981			1520166				10009513	2120441			189829	659965
							467664	1660832			20660	70279			1548834					2120977			190401	660477
							470504	1680299			20767	71799			1560661					2128209			190907	661888
							473841	1688228			21042	71977			1569224					2168026			190908	661994
							474536	1706486			21292	72350			1569989					2175990			191119	665301
							478177	1708732			21515	73440			1586603					2199503			191246	665492
							478670	1715781			21579	74380			1637595					2201007			192712	672642
							486356	1750077			22302	75327			1688155					2201630			192856	673566
							495791	1833972			22355	76532			1741849					2218746			194225	673844
							512687	1875032			23128	77213			1779708					2246906			195186	676197
							519294	1896495			24096	78658			1824427					2251016			196386	676681
							530575	1906015			26257	78755			1824827					2260397			198911	676793
							599847	1913170			26774	79309			1843136					2273178			200580	681077
							606709	1913789			27665	79785			1856393					2276378			201260	687814
							611002	1918225			29580	80613			1952338					2279684			201685	690656
							620624	1919832			29609	80663			2037527					2281987			202981	691706
							625520	1930492			30105	81546			2157807					2284608			205443	694166
							632464	1931874			30608	83396			2292785					2285416			207347	699726
							635364	1949371			33782	83553			2353208					2305167			207453	701037
							641159	1952203			42264	85068			2412448					2323619			208293	708364
							644947	1967179			42678	85765			2624081					2324187			208499	712787
							651334	1983685			42708	86497			2628520					2327909			208693	715835
							654304	1983848			42864	92168			2958681					2360727			209222	718229
							663012	2008586			43614	93383			3274844					2365622			210280	718421
							667225	2045913			43824	94970			3498269					2370276			210297	719246
							700927	2048727			46016	96409			4001869					2386009			210973	725383
							712895	2060582			46939	96727			5706381					2423627			211461	725647
							715524	2064631			49535	99801			10007393					2431604			211941	728184
							741669	2097871			56719	100367								2439554			213147	730630
							755661	2137917			57061	100563								2446312			213986	734723
							778174	2222421			57573	100609								2465974			214199	738781
							791961	2229470			59256	101301								2491515			214309	740018
							828772	2245384			61340	103761								2492587			214347	740313
							896445	2250162			64831	105883								2513023			214492	741579
							906232	2276940			65584	114703								2519196			215654	742007
							907861	2286379			66027	116113								2571482			217155	742144
							922141	2390518			82999	117960								2579676			217169	752832
							955118	2426249			90464	120959								2591708			217216	758597
							963936	2456515			93098	128850								2596782			217324	758703
							970703	2458843			96601	134531								2611531			218290	759619
							1032114	2469790			100538	136350								2613292			218313	759755
							1046696	2472607			102069	137067								2627793			218833	759968
							1068042	2490807			123108	139908								2628508			219110	762401
							1074380	2509665			124528	152653								2633757			219701	763576
							1088609	2528753			147683	156976								2635080			219740	765512
							1092473	2531441			164078	157825								2663076			221409	768658
							1116910	2556489			164540	163277								2670890			221616	769152
							1120791	2563339			165818	163409								2688926			221751	772822
							1149845	2619843			169770	187460								2702700			221908	773302
							1181041	2664327			170219	202718								2706072			223248	775467
							1196010	2672570			196978	216297								2775628			224030	776217
							1243002	2681773			201422	217870								2788203			224849	777293
							1330923	2684872			236940	231577								2807465			225030	777524
							1423712	2708983			509733	234445								2852603			227208	783723
							1453867	2736968			2279245	258285								2875497			227251	783858
							1517211	2740072				283542								2877273			229432	785657
							1561624	2742482				286873								2880723			230525	787233
							1583933	2812626				342268								2895195			231505	787790
							1631309	2856209				368100								2903275			231616	787829
							1663200	2892464				391712								2927857			232518	800434
							1720999	2892477				448325								2931261			233208	801973
							1725386	2939919				467436								2932631			234560	819348
							1737388	2983736				563022								2991600			235635	819896
							1837633	3003927				564969								2999121			235972	820267
							1862320	3012712												3022442			238905	821456
							1924087	3031821												3034264			239073	821766
							1971884	3049157												3042858			240587	822129
							2009284	3145804												3047757			240589	824156
							2087191	3194206												3067977			242499	826956
							2254690	3200857												3069220			244070	830359
							2270191	3235259												3098943			245151	831219
							2282174	3244351												3135664			247164	841656
							2329997	3280396												3149224			247399	843461
							2384781	3466749												3157519			248774	845222
							2589449	3500357												3183130			250374	848289
							2653597	3502164												3216396			251242	850992
							2785269	3533644												3230069			252113	858782
							2795365	3637479												3248333			252429	865814
							3091685	3640639												3260068			257086	867978
							3493267	3690238												3267596			257348	885899
								3722899												3271492			257576	888579
								3729083												3289873			257616	890380
								3753573												3306753			258088	893924
								3799280												3359660			258721	894826
								3834184												3373322			259296	901660
								3849040												3391684			259727	912599
								3870621												3391978			260555	914034
								3958619												3395298			264550	916152
								3962857												3459410			268588	923015
								4042573												3497789			268883	923891
								4124778												3513109			269018	926081
								4192541												3551222			269460	926246
								4238519												3683654			270020	929060
								4426791												3755813			270283	930548
								4563098												3786257			270725	940381
								4720052												3840896			273090	940744
								4732131												3855983			273099	942395
								4895408												3871856			273688	946526
								5013194												3874691			274213	952874
								5193350												3907750			274275	953296
								5223167												3938242			276439	958260
								5326162												3958713			277478	959084
								5413510												3969739			278195	959550
								5785196												4011810			282901	962995
								5890903												4013912			290030	963446
								5987329												4046316			290378	970080
								6143518												4065640			290745	975875
								6336780												4072769			292864	980921
								6405347												4075980			293500	982356
								6409861												4077919			294490	982824
								6675883										0		4245985			295717	987624
								7297758												4256469			296012	994093
								7335892												4284089			297425	995009
								7345694												4290588			299215	995687
								7409666												4330401			299541	996622
								7539630												4363778			300629	1006536
								8892880												4398457			300635	1006721
								9145639												4436170			301460	1008906
								10746728												4508352			303897	1014894
								11199396												4523829			307347	1020319
								12824768												4556019			307399	1024327
								25850484												4651396			308623	1025577
																				4761191			309937	1035600
																				4782497			310339	1039169
																				4807583			313459	1046118
																				4828495			313935	1051931
																				4896295			315687	1058220
																				4896388			316919	1069369
																				4951317			317897	1071946
																				4959030			318291	1071973
																				4974995			318494	1078427
																				5030036			323647	1092823
																				5057190			325553	1101567
																				5135598			329818	1107035
																				5150194			333573	1107114
																				5160134			334640	1112354
																				5264560			337342	1124335
																				5269467			343481	1125836
																				5369252			343937	1129396
																				5434452			344599	1132464
																				5438779			346168	1134477
																				5476672			346236	1138518
																				5576259			352987	1142159
																				5661488			356979	1142749
																				5718180			357164	1142795
																				5769403			357462	1143277
																				5805778			360824	1152196
																				5849628			379984	1156979
																				5869097			384388	1194891
																				6146027			385641	1207837
																				6262736			386307	1213636
																				6363905			388296	1216152
																				6380150			400799	1223356
																				6380464			401045	1226191
																				6393005			402947	1231165
																				6597950			411294	1246514
																				6600884			419313	1249111
																				6610855			425104	1249867
																				6623101			425361	1251112
																				6730664			434781	1258777
																				6880237			435034	1259091
																				6945282			435479	1264790
																				7119485			437187	1268754
																				7221700			443310	1271176
																				7253963			443778	1272014
																				7274625			462044	1275196
																				7562446			466332	1278140
																				7976472			470223	1287232
																				8101068			470569	1290942
																				8256105			472294	1302336
																				8310071			475231	1303644
																				8334402			480034	1316157
																				8390264			481185	1316512
																				8475848			488713	1320276
																				8532024			490020	1322120
																				8804413			491140	1327574
																				8934949			491673	1347572
																				9010109			495962	1352628
																				9242790			497280	1357499
																				9303677			522083	1359516
																				9456954			531956	1363385
																				9569668			542935	1393537
																				10112466			543506	1398648
																				10588604			549903	1431398
																				10608283			558946	1433578
																				10861277			563065	1436285
																				11184897			566328	1461544
																				11310557			581095	1479040
																				12584343			582507	1502100
																				12723122			584447	1504424
																				12754226			586092	1504720
																				14052417			604833	1506687
																				15810235			605696	1514268
																				18735588			613358	1523679
																				21302893			614427	1524781
																							623579	1547813
																							627331	1576783
																							635847	1585560
																							646741	1585718
																							651464	1600776
																							656847	1610117
																							660446	1612803
mean			635376	1.92502e+06			271082	1.1947e+06			15875.2	33017.8			431487	971044			593799	2.00347e+06			672751	1626673
																							674492	1629739
ratio Rif1/mock CTF				3.02973				4.40718				2.07984				2.25046				3.37399			683211	1634242
																							708326	1647180
																							709074	1657699
																							710463	1747047
																							720637	1771802
																							726106	1776621
																							754951	1803972
																							760970	1814800
																							764613	1819131
																							800262	1820654
																							859332	1887169
																							883428	1908178
																							918398	1926823
																							950242	1958237
																							1073254	1969053
																							1091251	1976581
																							1113964	1984481
																							1164338	2067100
																							1335075	2093614
																							1345539	2114226
																							1403580	2114871
																							1538128	2143803
																							1823782	2149670
																							1982807	2150731
																							1987799	2154021
																							2613564	2155855
																								2199982
																								2200247
																								2229031
																								2245588
																								2285830
																								2298172
																								2313446
																								2331763
																								2350870
																								2368726
																								2372545
																								2415714
																								2497255
																								2510963
																								2612086
																								2619760
																								2665312
																								2673248
																								2826118
																								3062283
																								3076016
																								3093918
																								3131950
																								3161660
																								3274311
																								3401633
																								3779072
																								3779872
																								3835666
																								4131317
																								4458789
																								4503046
																								4609496
																								4710444
																								4941805
																								5547542
																								6018196
																								6407423
																								6556325
																								6732523
																								6970039
																								6984826
																								10272010
																							194509	747838
																								3.84474

## Sheet: Feuil2
		2019-11-06	frozen ex		2021-10-19	same frozen	extract	2021-10-27	samefrozen		231121	combing	fresh ex	301121	combing	fresh ex	231121	combing	fresh ex	301121	combing	fresh ex
	Name	delta MOCK90	delta RIF1 90 min	Rif/mock	delta MOCK90	delta RIF190	Rif/mock	delta Rif90min	delta mock 90min	Rif/mock	delta MOCK60min	delta RIF160min	Rif/mock	delta MOCK60min	delta RIF160	Rif/mock	delta MOCK90min	delta RIF190min	Rif/mock	delta MOCK90	delta RIF190	Rif/mock
	Mean area	310.191	237.317		283.117	276.292		237.601	226.039		410.525	462.406		324.384	339.203		434.938	367.384		339.399	358.51
	Mean CTF	628432	1.91576e+06	3.04848	270122	1.16769e+06	4.32281	194571	100635	1.93343	412130	893441	2.16786	193156	735196	3.80622	847040	3.12084e+06	3.6844	587728	1.95728e+06	3.33025
	Percent of replication	0.185792	0.514423		0.185841	0.605816		0.379679	0.179321		0.192523	0.387295		0.0738162	0.469441		0.396262	0.78252		0.341513	0.763689
	Mean bkg Density	2.96623e+07	3.50284e+07		1.45313e+07	2.59277e+07		14064004	2.47486e+07		1.938e+07	3.50676e+07		1.92699e+07	1.70961e+07		30836811	3.96195e+07		2.14711e+07	3.88583e+07
	Replication	34	107		105	375		213	111		103	189		53	361		212	385		167	530
	NO Replication	149	101		460	244		348	508		432	299		665	408		323	107		322	164
	Number of nuclei	183	208		565	619		561	619		535	488		718	769		535	492		489	694
	Number of slides	10	10		12	12		13	13		11	11		12	15		11	12		10	14
	MW CTF distrib P value	< 0,0001			< 0,0001			< 0,0001			< 0,0001			< 0,0001
								did exchange samples for Rhoda somewhere!
